CORRECTION

# Correction: The Effect on Mortality of Fluconazole or Echinocandins Treatment in Candidemia in Internal Medicine Wards

The *PLOS ONE* Staff

## Notice of Republication

This article was republished on June 3, 2015, to correct an error in the title. The correct title is: The Effect on Mortality of Fluconazole or Echinocandins Treatment in Candidemia in Internal Medicine Wards. Please download this article again to view the correct version. The originally published, uncorrected article and the republished, corrected article are provided here for reference.

## Supporting Information

**S1 File. Originally published, uncorrected article.**  
(PDF)

**S2 File. Republished, corrected article.**  
(PDF)

## Reference

1. De Rosa FG, Corcione S, Filippini C, Raviolo S, Fossati L, Montrucchio C, et al. (2015) The Effect on Mortality of Fluconazole or Echinocandins Treatment in Candidemia in Internal Medicine Wards. *PLoS ONE* 10(5): e0125149. doi: [10.1371/journal.pone.0125149](https://doi.org/10.1371/journal.pone.0125149) PMID: [25938486](https://pubmed.ncbi.nlm.nih.gov/25938486/)

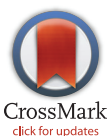

## OPEN ACCESS

**Citation:** The *PLOS ONE* Staff (2015) Correction: The Effect on Mortality of Fluconazole or Echinocandins Treatment in Candidemia in Internal Medicine Wards. *PLoS ONE* 10(6): e0131264. doi:10.1371/journal.pone.0131264

**Published:** June 22, 2015

**Copyright:** © 2015 The PLOS ONE Staff. This is an open access article distributed under the terms of the [Creative Commons Attribution License](https://creativecommons.org/licenses/by/4.0/), which permits unrestricted use, distribution, and reproduction in any medium, provided the original author and source are credited.
